# Supplementary material for: HAMLET a human milk protein‐lipid complex induces a pro‐inflammatory phenotype of myeloid cells
Source: PubMed Central journal article supplement — Eur J Immunol. 2021 Feb 10;51(4):965–77. doi: 10.1002/eji.202048813 (PMC8248127; doi:10.1002/eji.202048813), 2021-02-10
Supplement: EJI-51-965-s001.pdf [file EJI-51-965-s001.pdf]

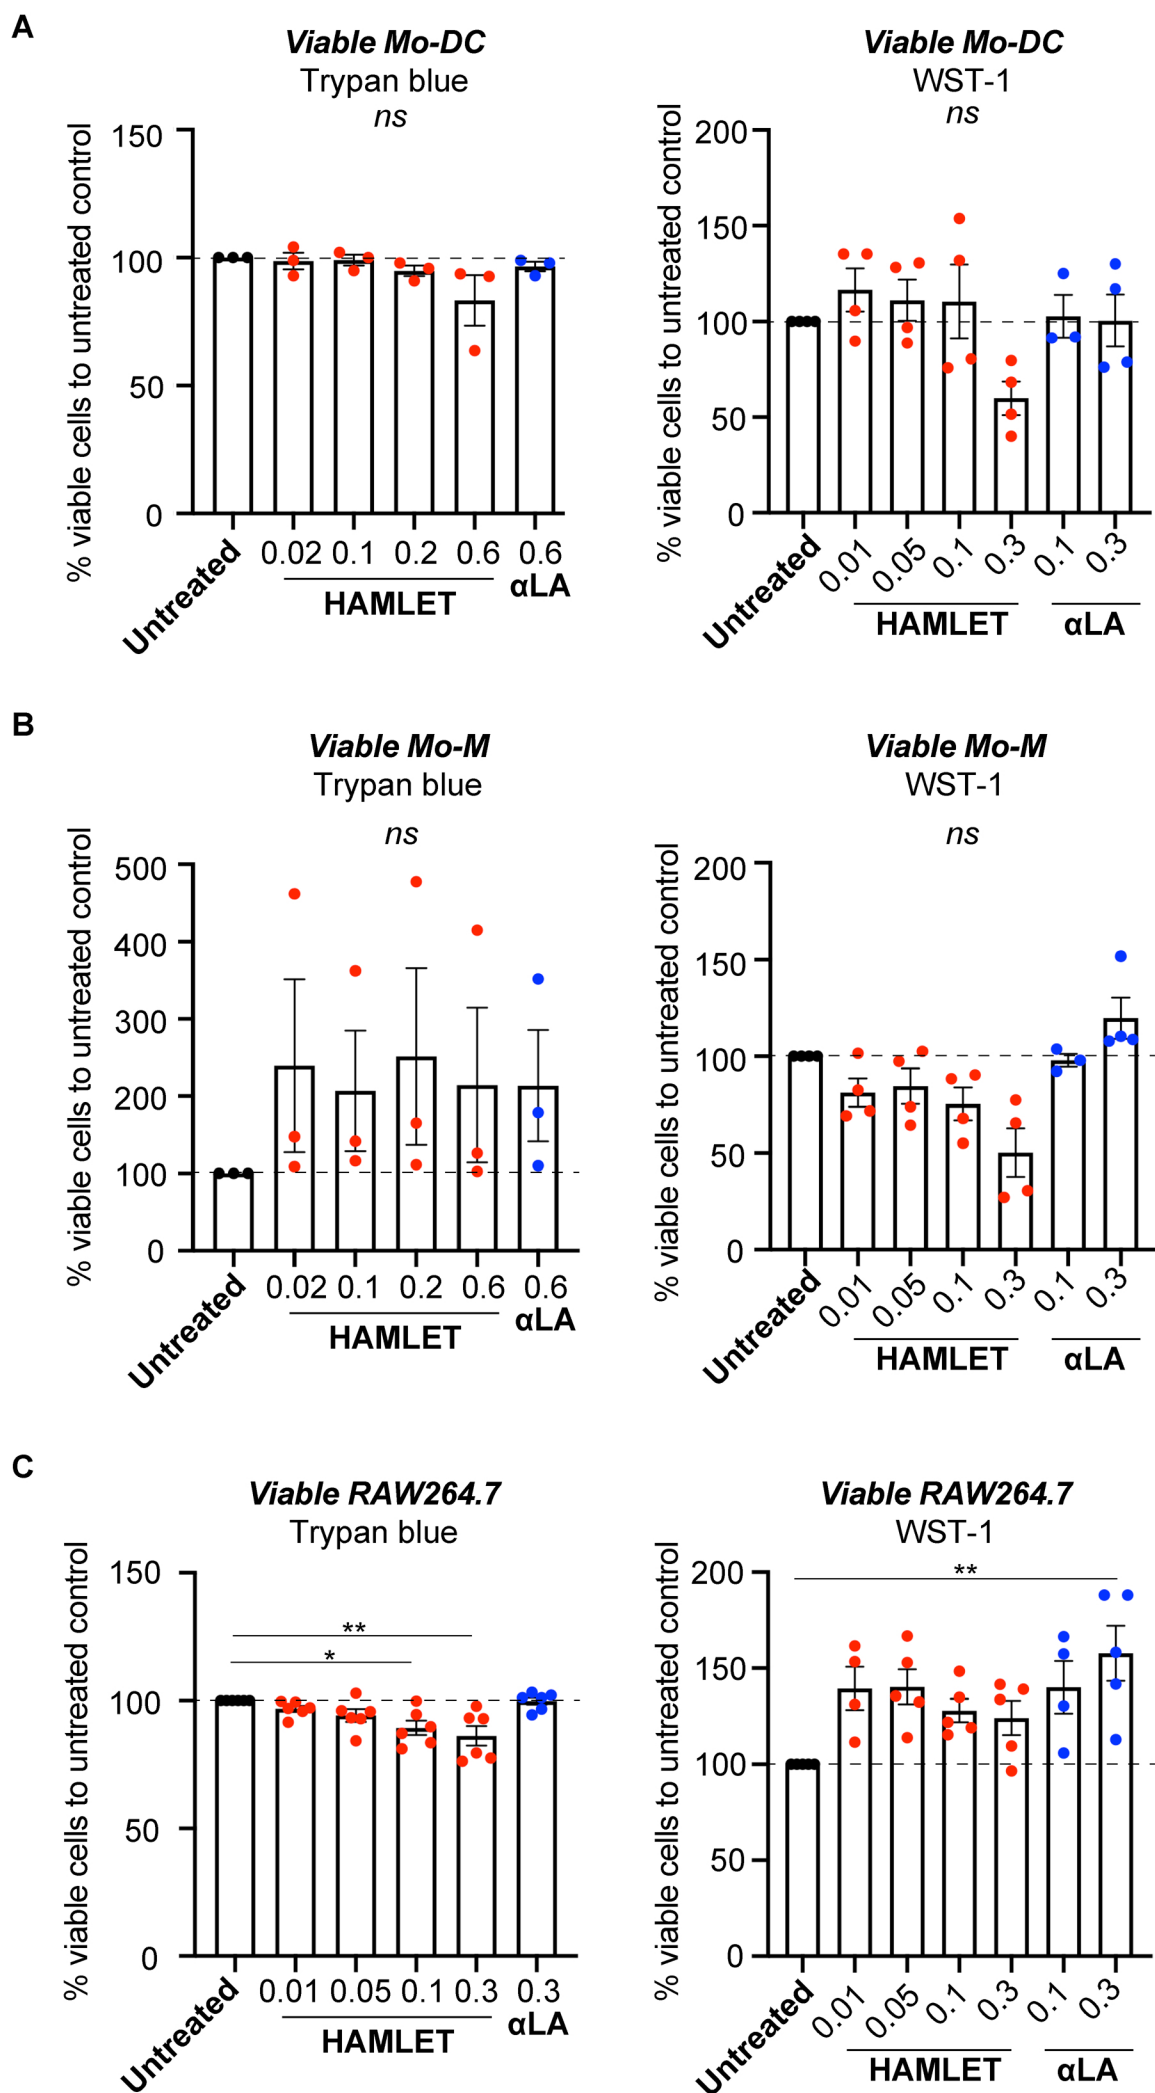

**Supplemental Figure 1.** Primary human Mo-DC (A), Mo-M (B) or RAW264.7 murine macrophages (C) were treated or not in SFM with indicated concentrations (mg/ml) of HAMLET (*red*) or native  $\alpha$ LA (*blue*) for 1-h. The cells were then incubated in fresh medium overnight. The viability was assessed by trypan blue exclusion assay (*left panels*) or WST-1 assay (*right panels*). Individual data points of percentage (%) viable cells compared to untreated control are shown with mean and SEM. N=3-4 for A and B and N=4-6 for C. Statistics by one-way ANOVA with Tukey's multiple comparison test. ns = not significant, \*  $P<0.05$  and \*\*  $P<0.01$ .

A

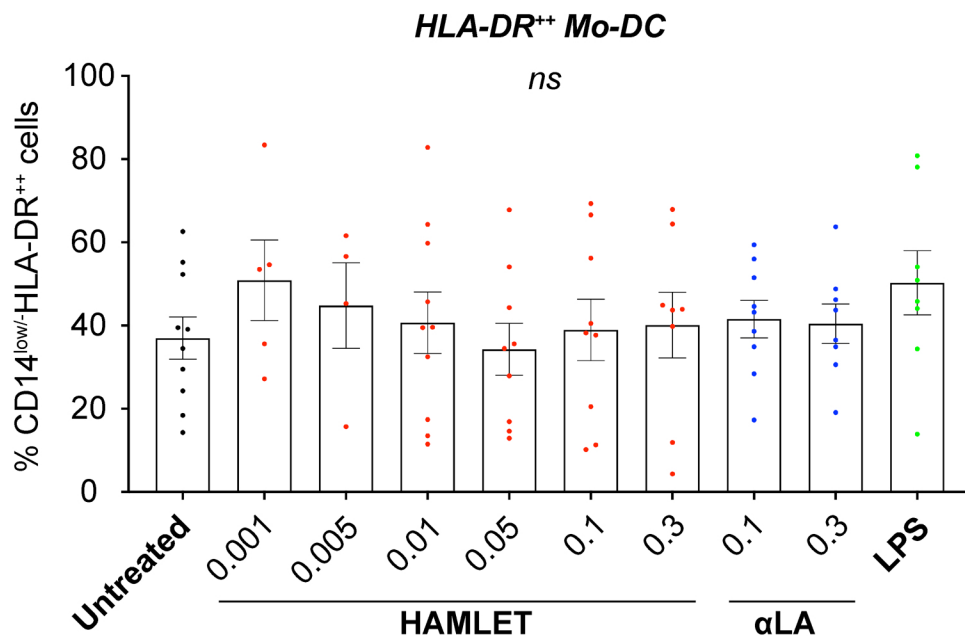

B

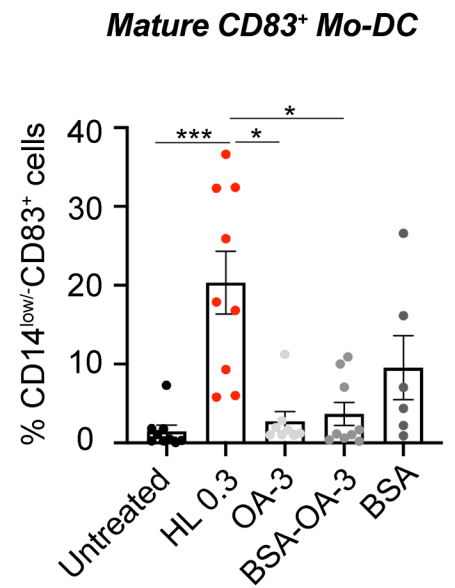

C

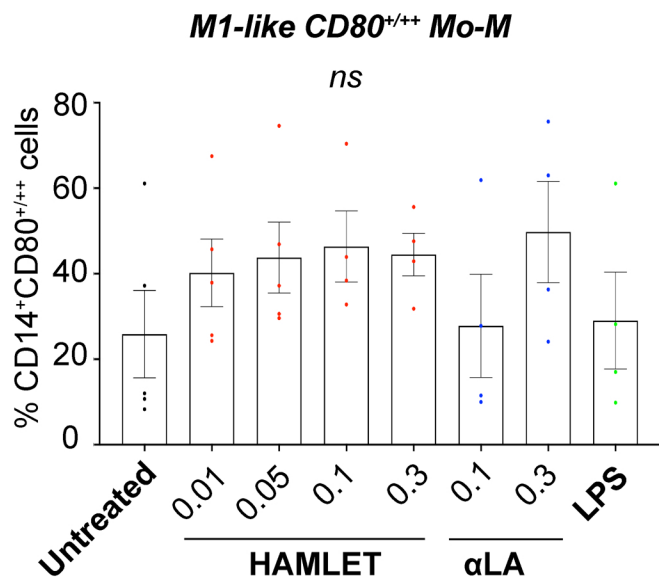

D

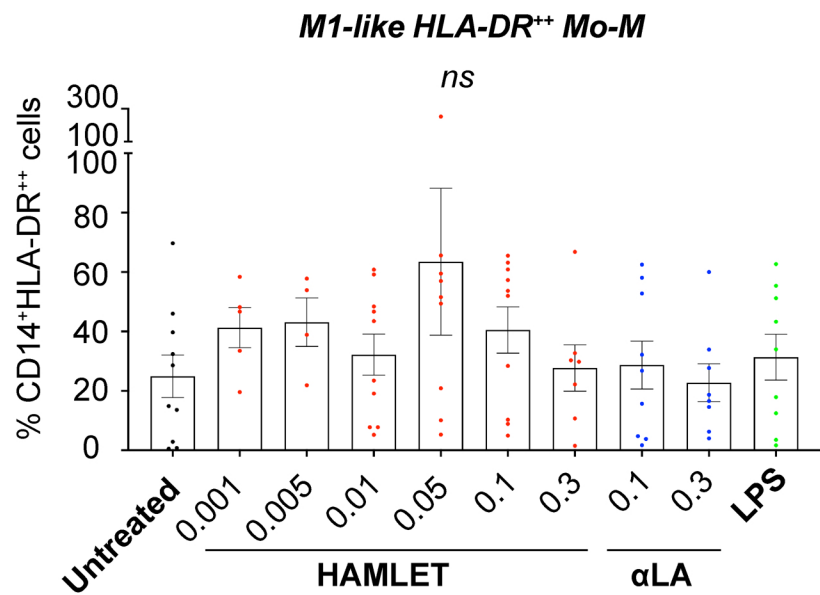

E

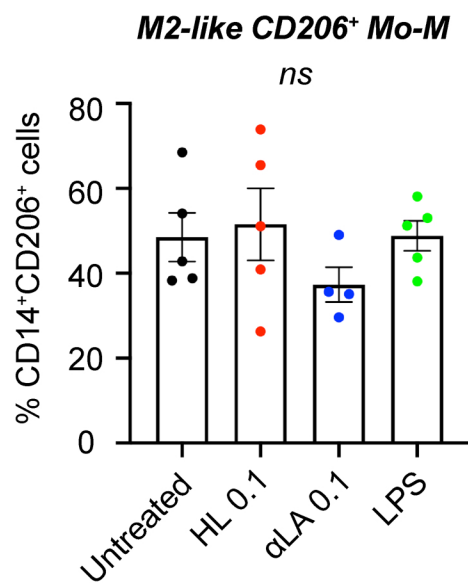

F

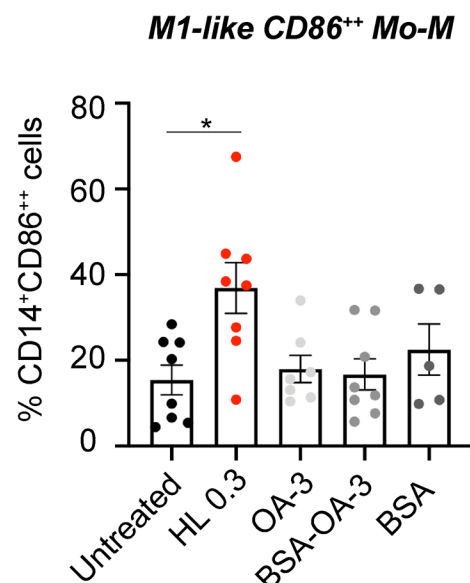

**Supplemental Figure 2.** Flow cytometric analyses of primary human Mo-DCs and Mo-M treated in SFM for 1-h and grown overnight in fresh differentiation medium. Individual data points of percentages (%) of all viable cells, with mean and SEM shown. **(A)** Mo-DCs were treated with indicated concentration of HAMLET (*red*) or native  $\alpha$ LA (*blue*, mg/ml) or with 100 ng/ml LPS (*green*). Graphs depict % CD14<sup>low/-</sup>HLA-DR<sup>++</sup> of all viable cells. N=4-10. **(B)** Mo-DCs were treated with 0.3 mg/ml HAMLET (*red*) or the corresponding amount of oleic acid (OA-3) in complex or not with BSA (BSA-OA-3) or with BSA alone (BSA). Graphs depict % CD14<sup>low/-</sup>CD83<sup>+</sup> cells. N=6-9. **(C-E)** Mo-M were treated with indicated concentrations of HAMLET (*red*) or native  $\alpha$ LA (*blue*, mg/ml) or with 100 ng/ml LPS (*green*). Graphs depict % CD14<sup>+</sup>CD80<sup>+/++</sup> cells, N=4-5 (C), CD14<sup>+</sup>HLA-DR<sup>++</sup> cells, N=4-10 (D) or CD14<sup>+</sup>CD206<sup>+</sup> cells (E), N=4-5. **(F)** Mo-M were treated with 0.3 mg/ml HAMLET (*red*) or the corresponding amount of oleic acid (OA-3) in complex or not with BSA (BSA-OA-3) or with BSA alone (BSA). Graphs depict % CD14<sup>+</sup>CD86<sup>++</sup> cells. N=5-8. All statistics by Kruskal-Wallis with Dunn's multiple comparisons test to the untreated control (A and C-E) or between all samples (B and F). ns = not significant, \*  $P < 0.05$ , \*\*\*  $P < 0.001$ .

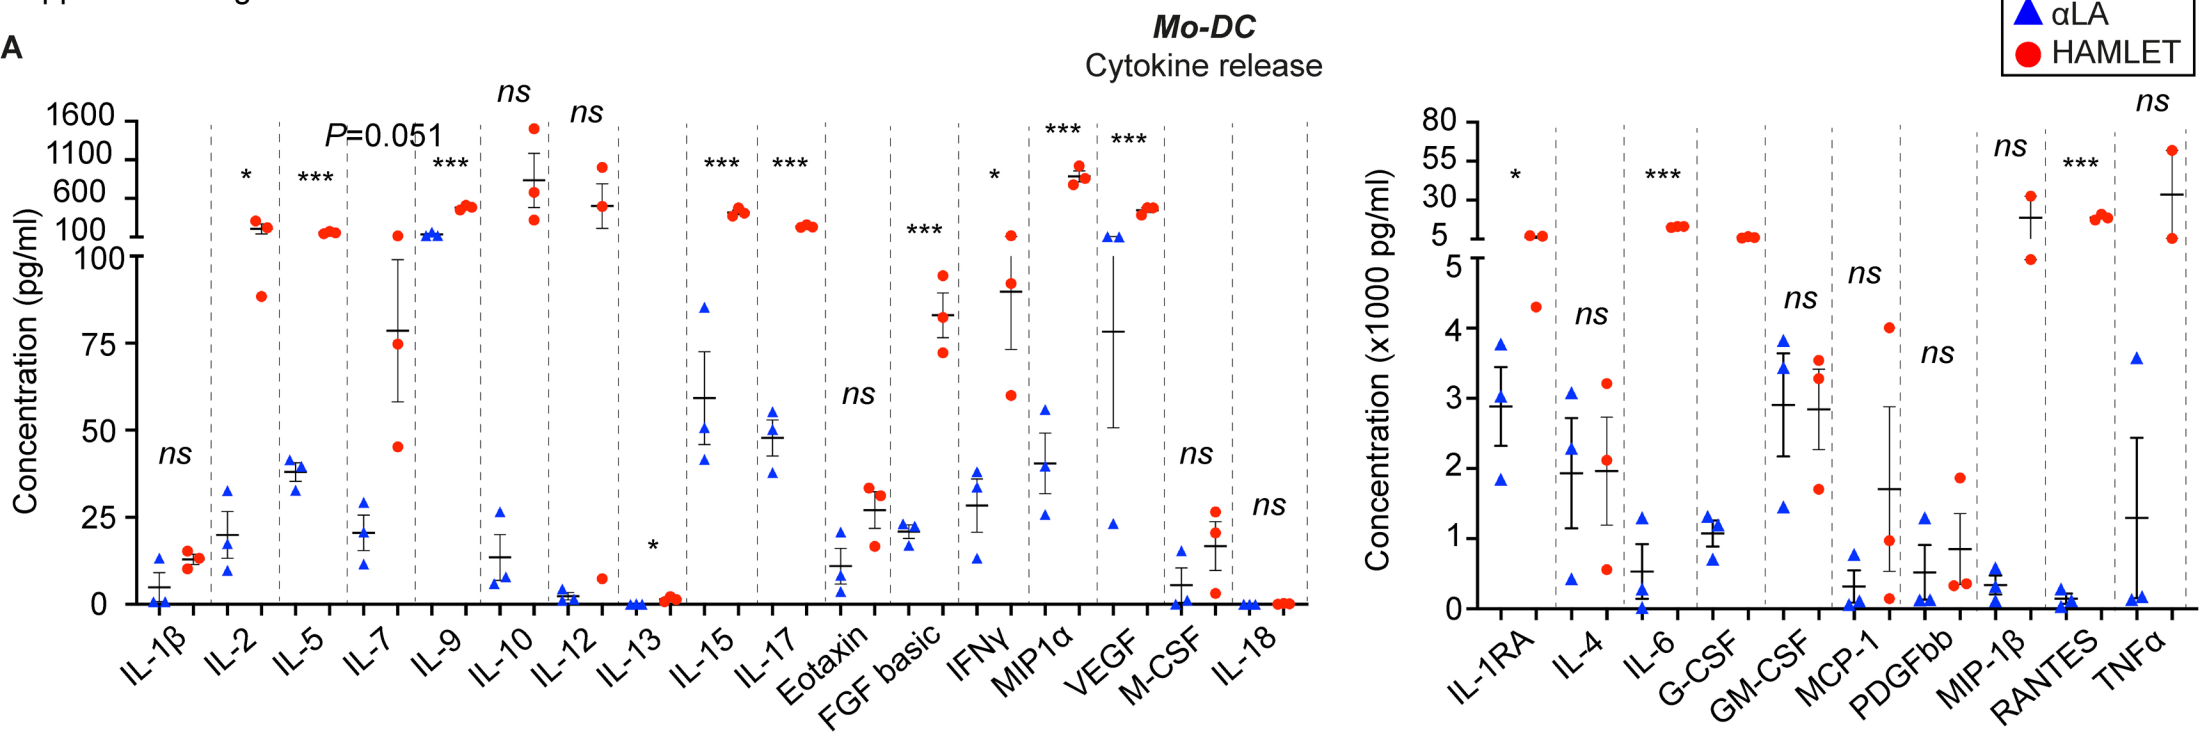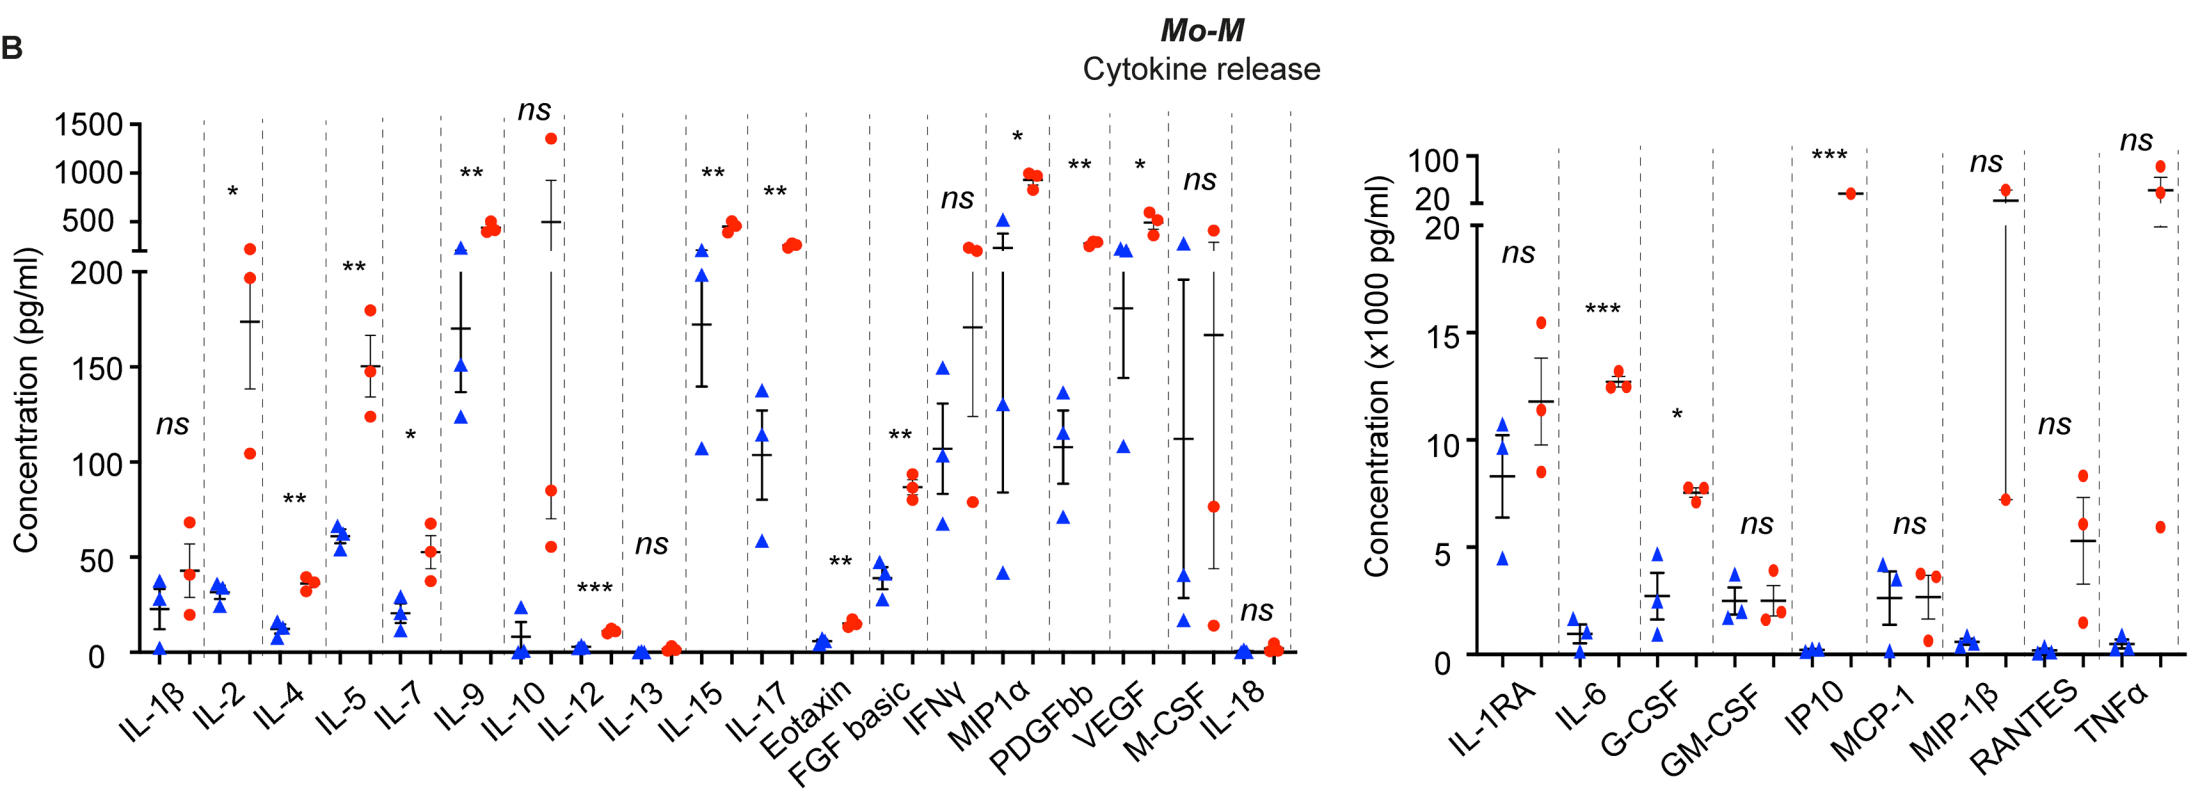

**Supplemental Figure 3.** Primary human Mo-DCs (**A**) or Mo-M (**B**) were stimulated with 0.1 mg/ml HAMLET (*red* circles) or native  $\alpha$ LA (*blue* triangles) for 1-h and grown overnight in fresh differentiation medium. The release of indicated cytokines were analyzed in the supernatants by Bio-plex assay. Individual data points with mean and SEM are shown. N=3. Statistics by unpaired t-test. ns = not significant, \*  $P < 0.05$ , \*\*  $P < 0.01$  and \*\*\*  $P < 0.001$

A

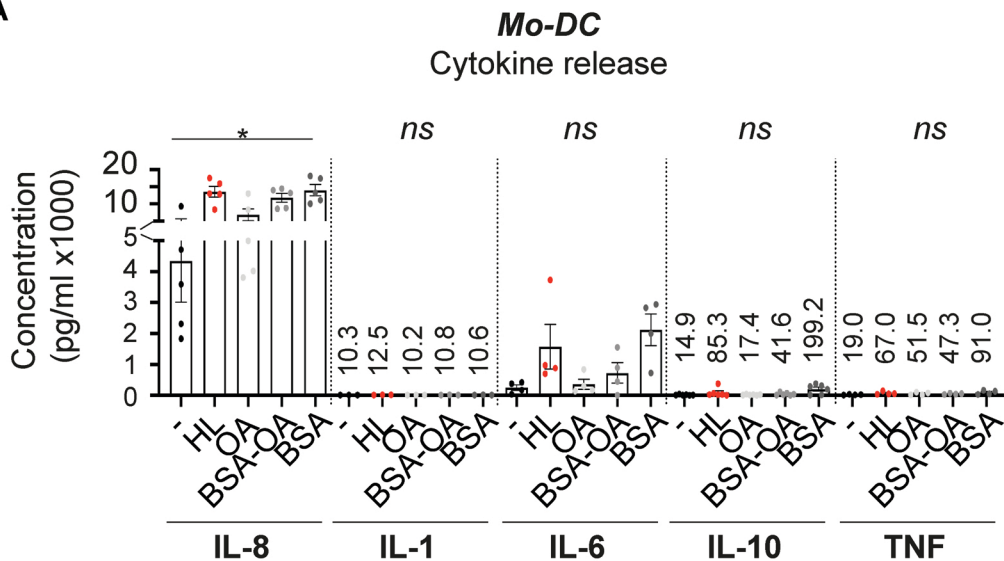

B

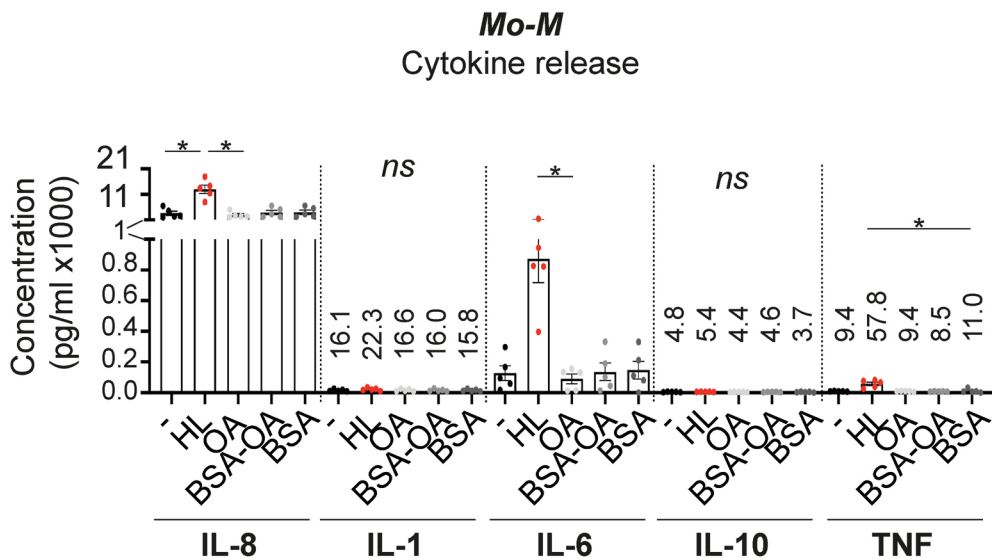

**Supplemental Figure 4.** Supernatants from primary human Mo-DC (**A**) or Mo-M (**B**) from Supplemental Figure 2B and F, respectively, treated with 0.3 mg/ml HAMLET (*red*) or the corresponding amount of oleic acid (OA-3) in complex or not with BSA (BSA-OA-3) or with BSA alone were analyzed by CBA. Individual data points of respective cytokine concentration (pg/ml) with mean and SEM are shown. Values represent mean concentration. N=3-5 individual experiments. Statistics by Kruskal-Wallis with Dunn's multiple comparison test between all samples. ns= not significant and \*  $P < 0.05$ .



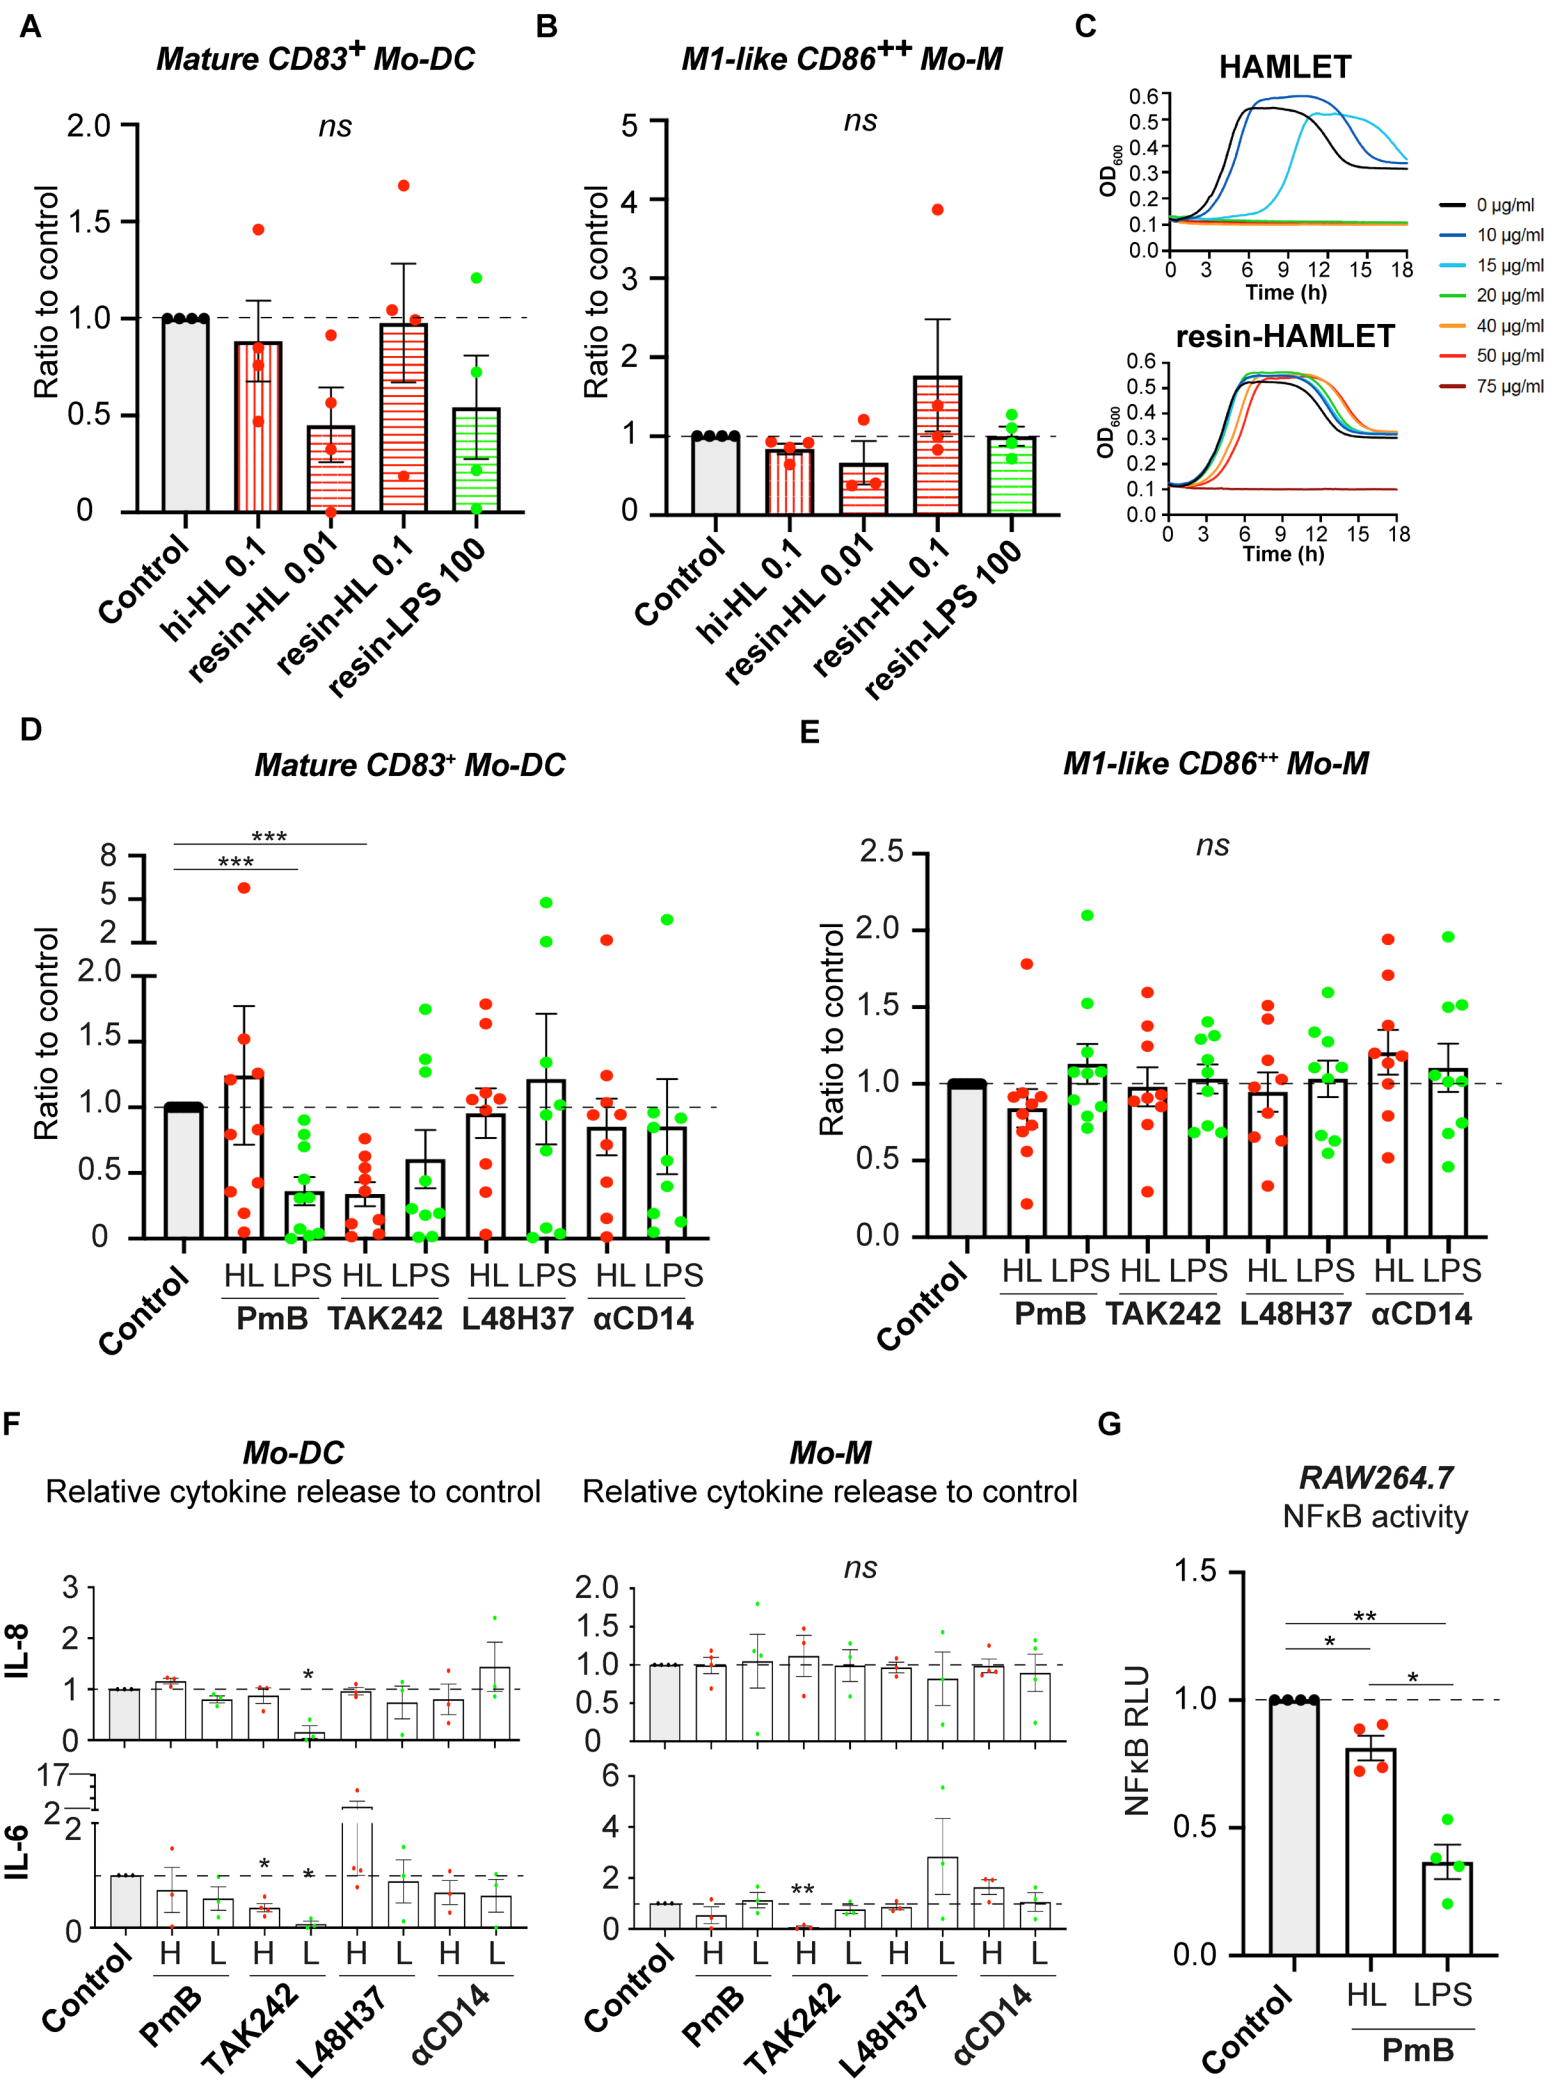

**Supplemental Figure 5.** (A-B) Primary human Mo-DCs (A) and Mo-M (B) were treated or not with 0.1 mg/ml boiled HAMLET (heat-inactivated; hi-HL), 0.01 or 0.1 mg/ml resin-treated HAMLET (resin-HL) or 100 ng/ml resin-treated LPS (resin-LPS) for 1-h, and grown overnight in fresh differentiation medium. Non-processed HAMLET or LPS served as controls (control; grey) Individual data points of relative % CD14<sup>low/-</sup>CD83<sup>+</sup> mature Mo-DCs, or CD14<sup>+</sup>CD86<sup>++</sup> M1-like Mo-M to respective control, with mean and SEM are shown. Individual data points are derived from N=2-3 separate experiments. (C) MIC growth curves for *S. pneumoniae* strain D39, treated with indicated concentrations of untreated HAMLET or resin-treated HAMLET for 18-h at 37°C, with the absorbance at OD<sub>600</sub> measured every 10-minutes. (D-E) Primary human Mo-DCs (D) or Mo-M (E) were pre-treated with indicated inhibitor for 2-h, stimulated with 0.1 mg/ml HAMLET (HL; red) or 100 ng/ml LPS (green) and subsequently grown overnight in fresh differentiation medium. The cells were analyzed by flow cytometry. Individual data points of relative % CD14<sup>low/-</sup> CD83<sup>+</sup> Mo-DC or CD14<sup>+</sup>CD86<sup>++</sup> M1-like Mo-M to respective control (HL or LPS without inhibitor, but with PBS, ethanol or DMSO), with mean and SEM shown. N=9-10 individual experiments. (F) Supernatants from primary human Mo-DCs (left) or Mo-M (right) from panel D-E were analyzed by CBA. Individual data points of the relative release of IL-8 (upper panel) or IL-6 (lower panel) to respective control, with mean and SEM are shown. N=3 separate experiments. (G) Dual luciferase NFκB promoter assay using murine RAW264.7 macrophages stimulated with 0.1 mg/ml HAMLET (HL) or 100 ng/ml LPS with or without 10 μg/ml PmB. Individual data points of relative promoter activity (RLU) to control (HL or LPS only) with mean and SEM are shown. N=2 experiments. All statistics by paired t-test. ns = not significant, \*  $P < 0.05$  and \*\*  $P < 0.01$ .

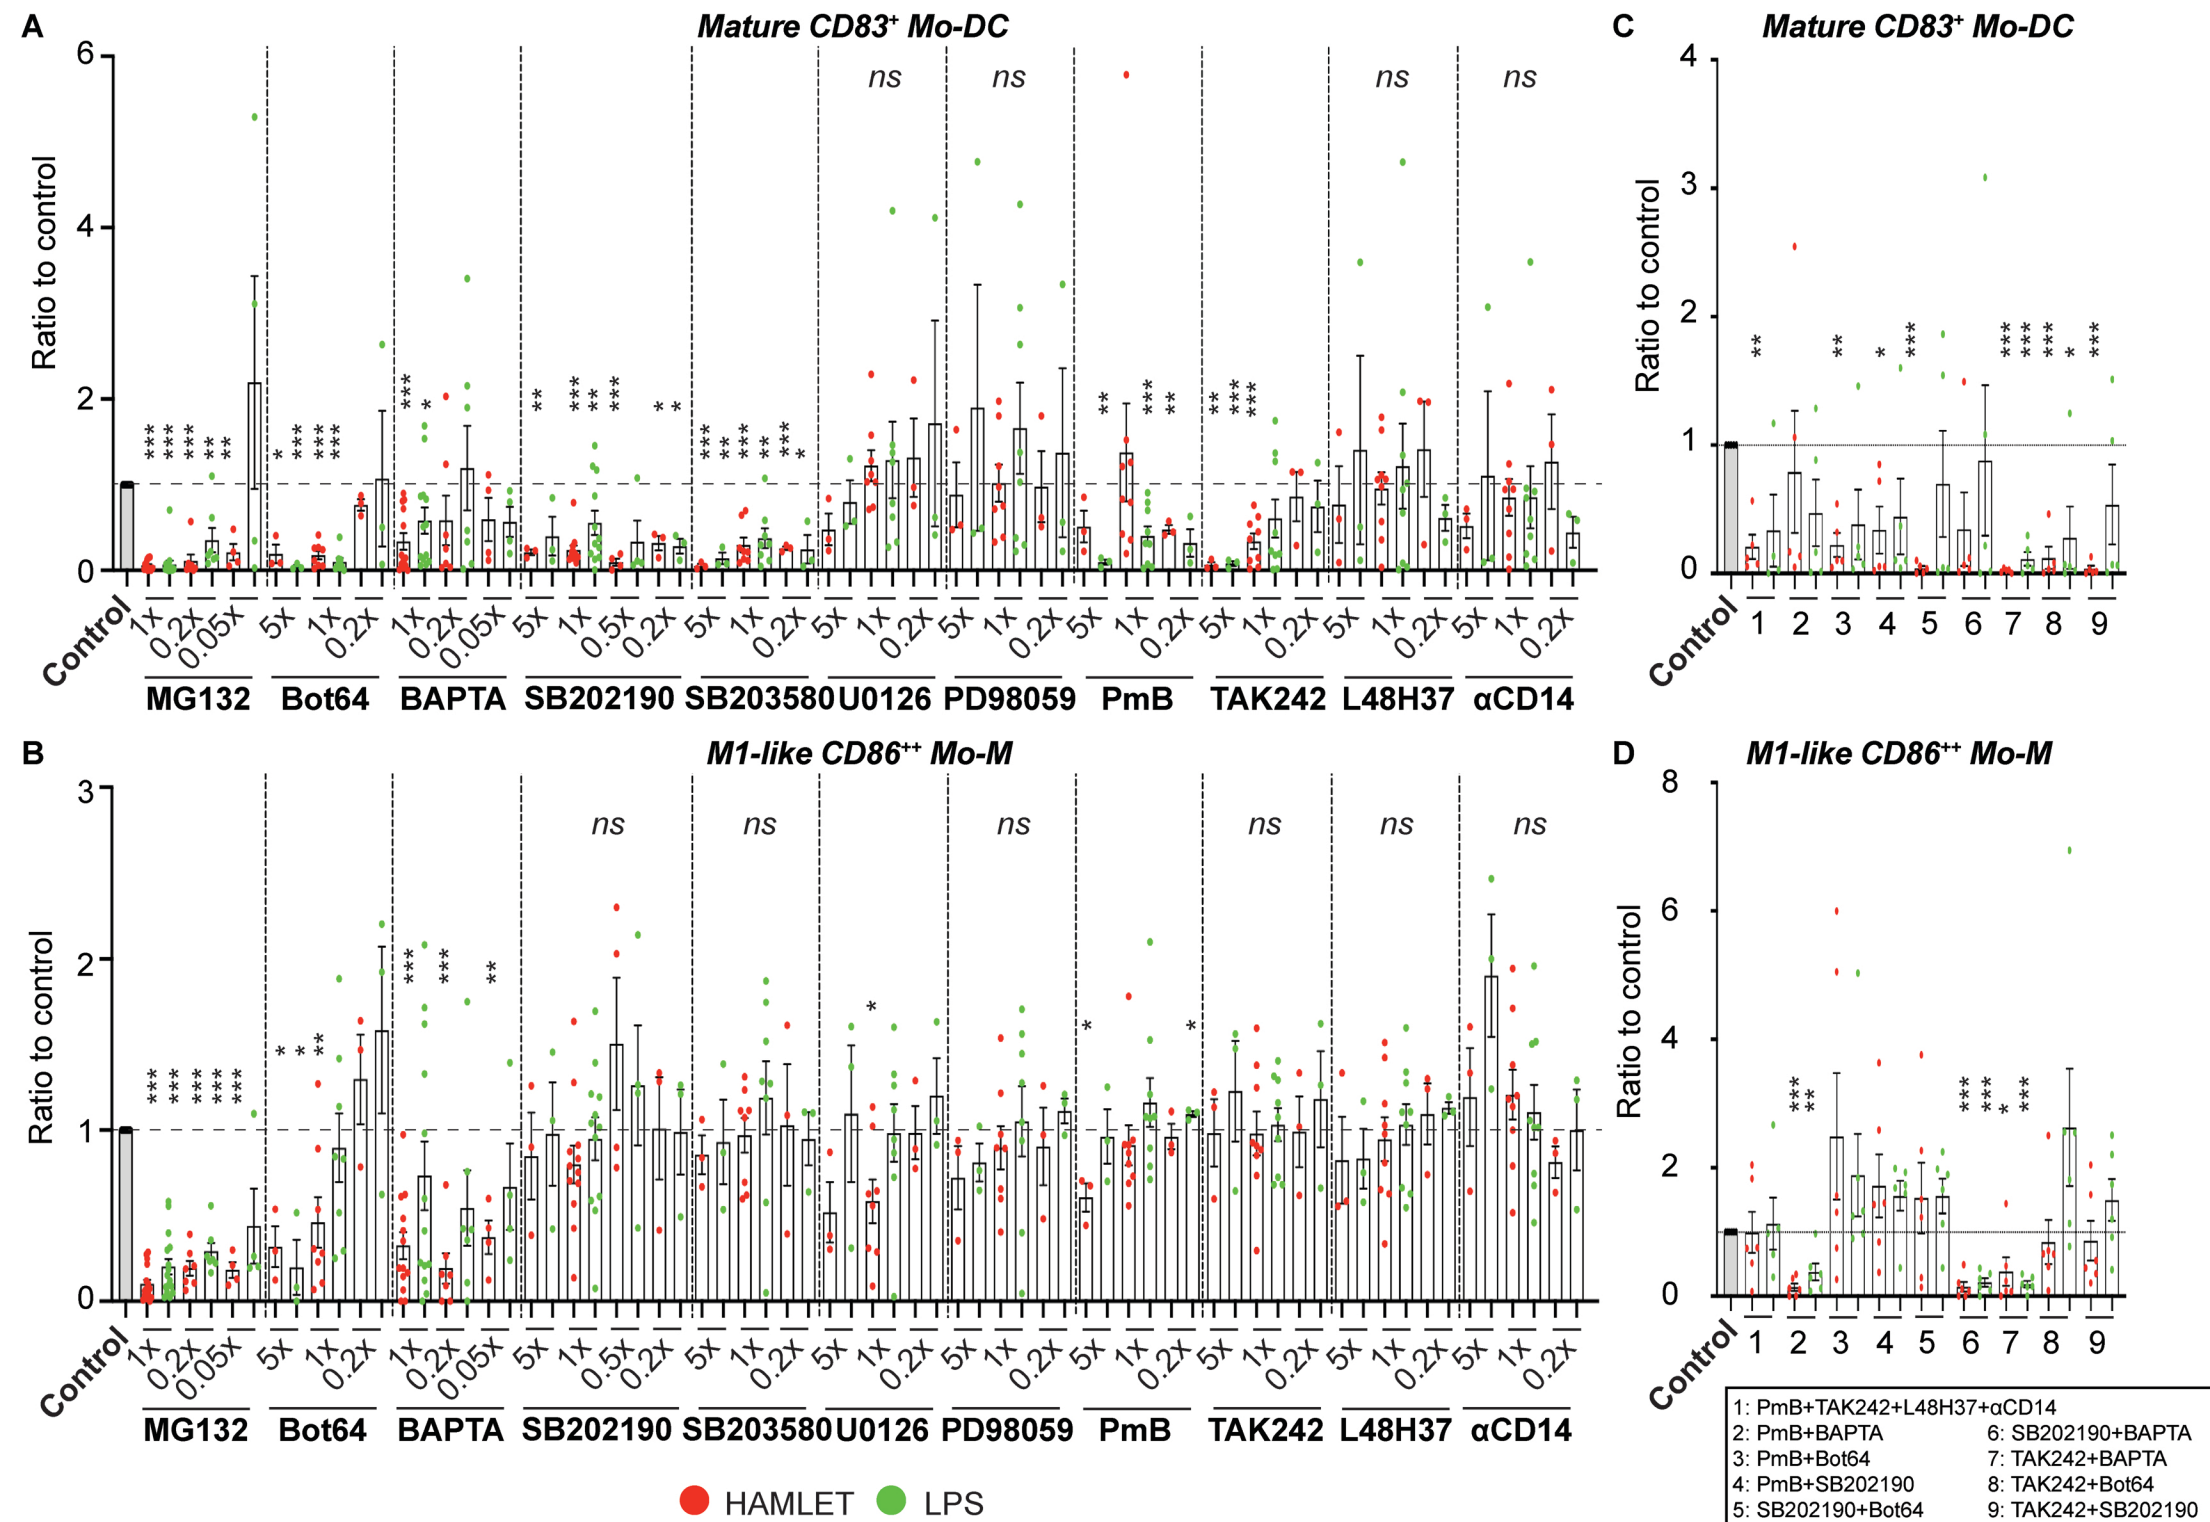

**Supplemental Figure 6.** Primary human Mo-DCs (A, C) or Mo-M (B, D) were pre-treated with indicated inhibitors at various concentrations for 2-h alone (**A-B**) or in combinations (**C-D**), stimulated with 0.1 mg/ml HAMLET (HL; *red*) or 100 ng/ml LPS (*green*) for 1-h and subsequently grown overnight in fresh differentiation medium. (C-D) 1: 1x PmB + 1x TAK242 + 1x L48H37, 1x  $\alpha$ CD14 neutralizing antibody, 2: 1x PmB + 0.2x BAPTA-AM, 3: 1x PmB + 1x BOT-64, 4: 1x PmB + 0.5x SB202190, 5: 0.5x SB202190 + 1x BOT-64, 6: 0.5x SB202190 + 0.2x BAPTA-AM, 7: 1x TAK242 + 0.2x BAPTA-AM, 8: 1x TAK242 + 1x BOT-64, 9: 1x TAK242 + 0.5x SB202190. The cells were analyzed by flow cytometry. Individual data points of relative % CD14<sup>low/-</sup> CD83<sup>+</sup> Mo-DC or CD14<sup>+</sup>CD86<sup>++</sup> M1-like Mo-M to respective control (HL or LPS without inhibitor, but with PBS, ethanol or DMSO), with mean and SEM shown. N=3-16 individual experiments. All statistics by paired t-test to the respective control. \*  $P < 0.05$ , \*\*  $P < 0.01$ , \*\*\*  $P < 0.001$ .

A

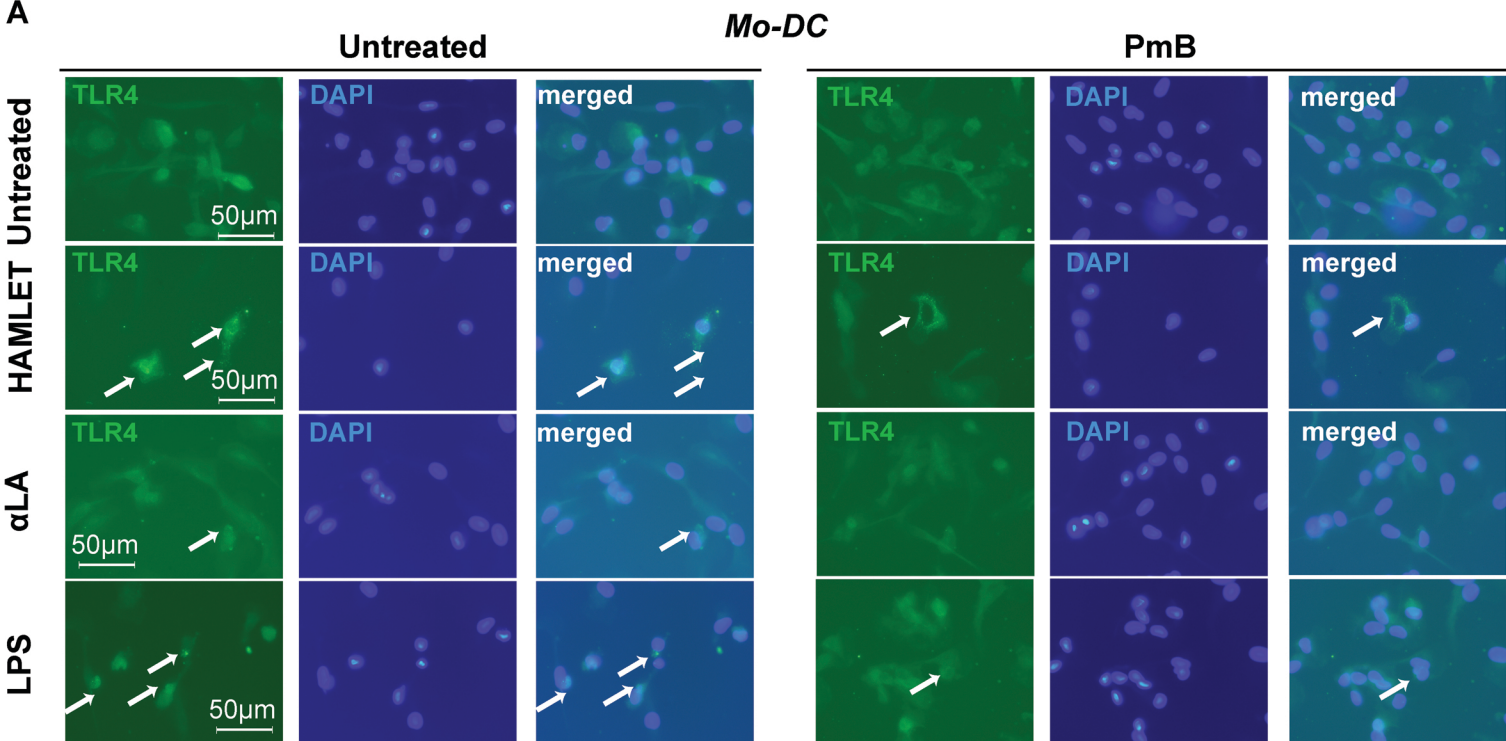

B

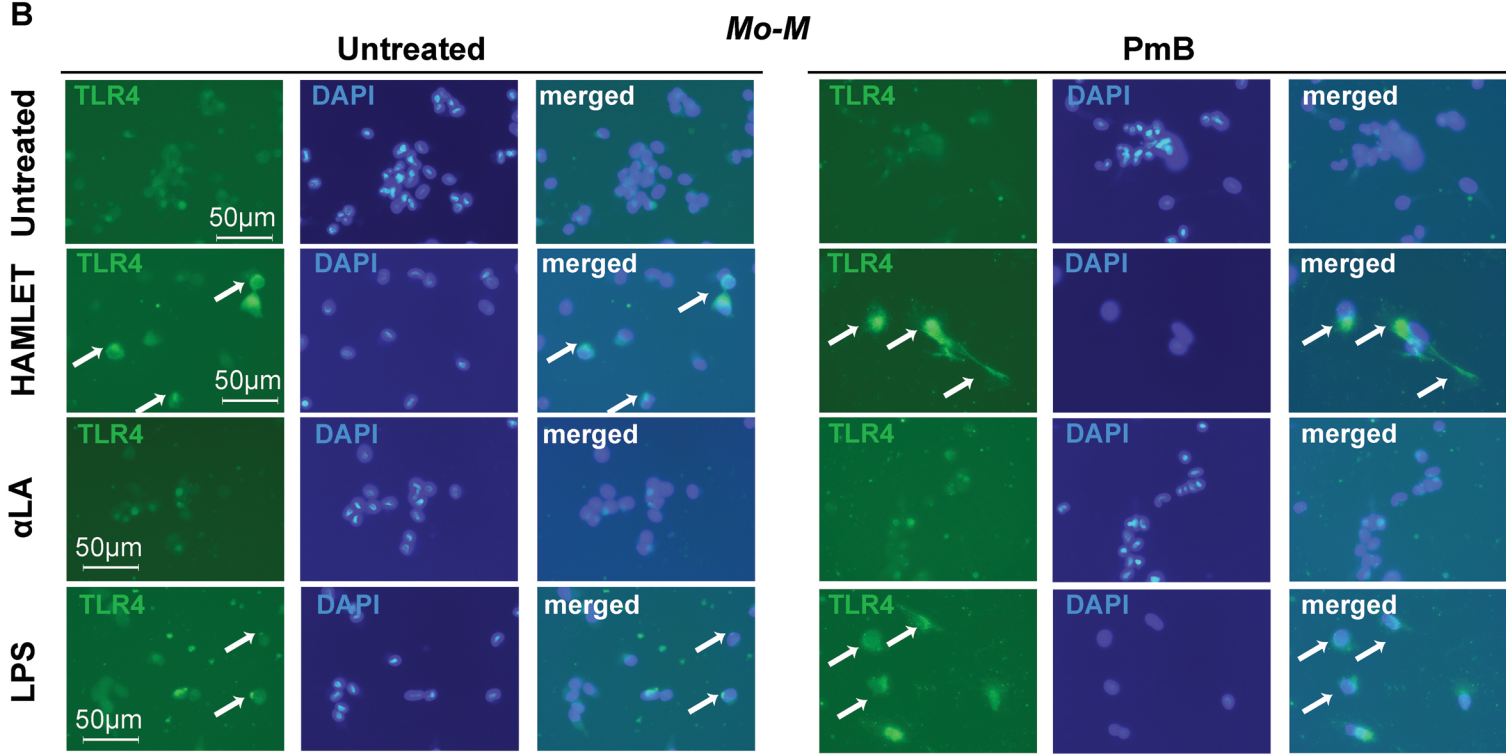

**Supplemental Figure 7.** Primary human Mo-DC (**A**) and Mo-M (**B**) were pre-treated with 10  $\mu\text{g/ml}$  PmB for 2-h and stimulated with HAMLET,  $\alpha\text{LA}$  or LPS. The cells were analyzed 18-h post-stimulation by immunofluorescence for TLR4 localization. White arrows indicate differences in localization pattern of TLR4. Vectashield DAPI was used as nuclear stain for all experiments. Images are representative of N=3 individual experiments.

A

*Mo-DC*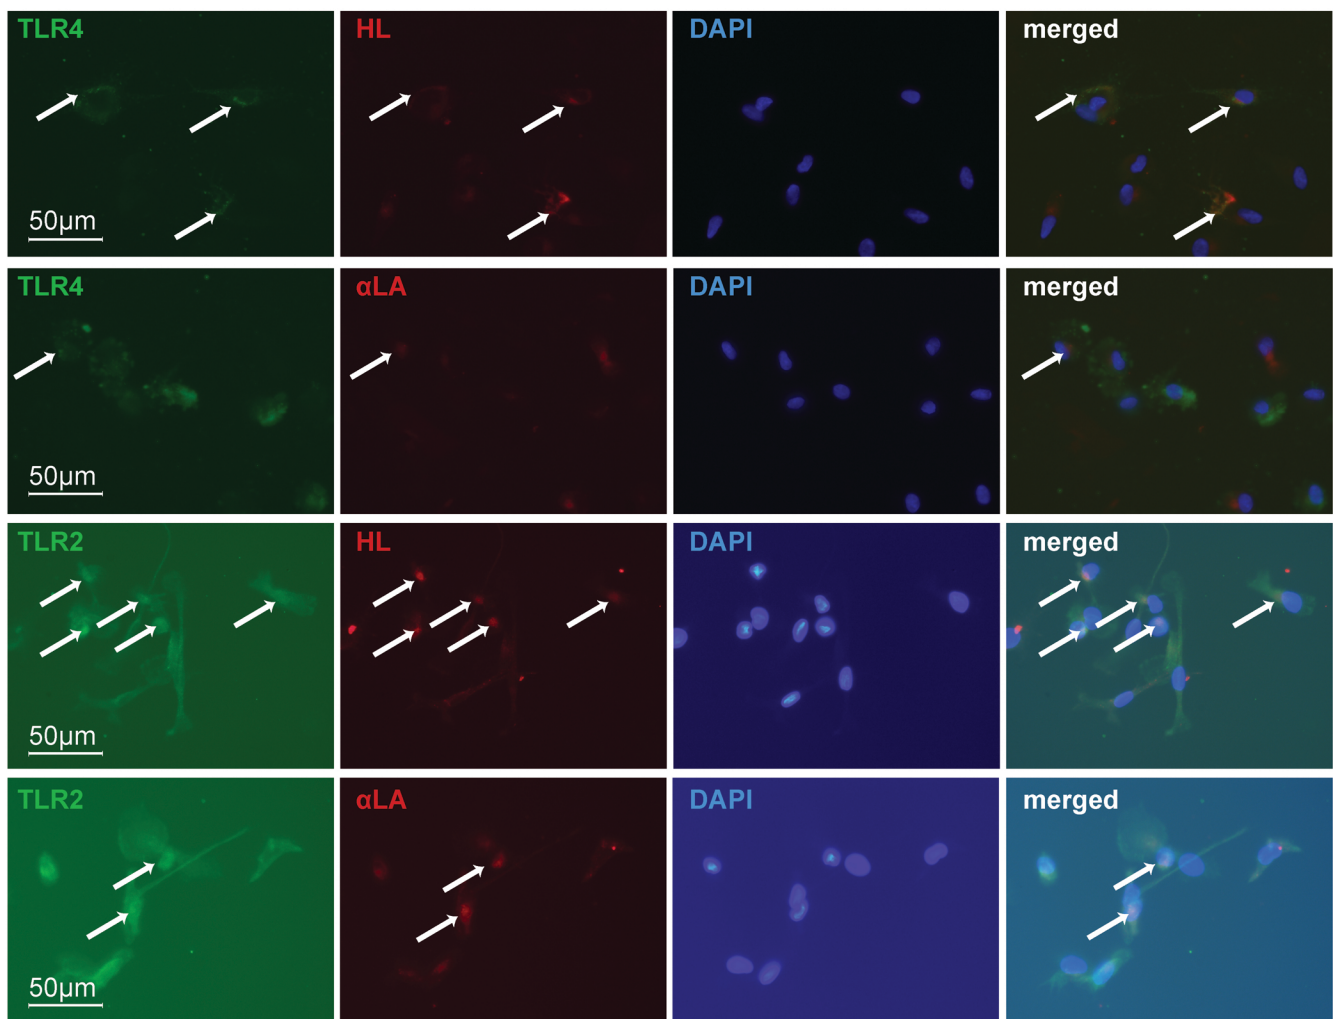

B

*Mo-M*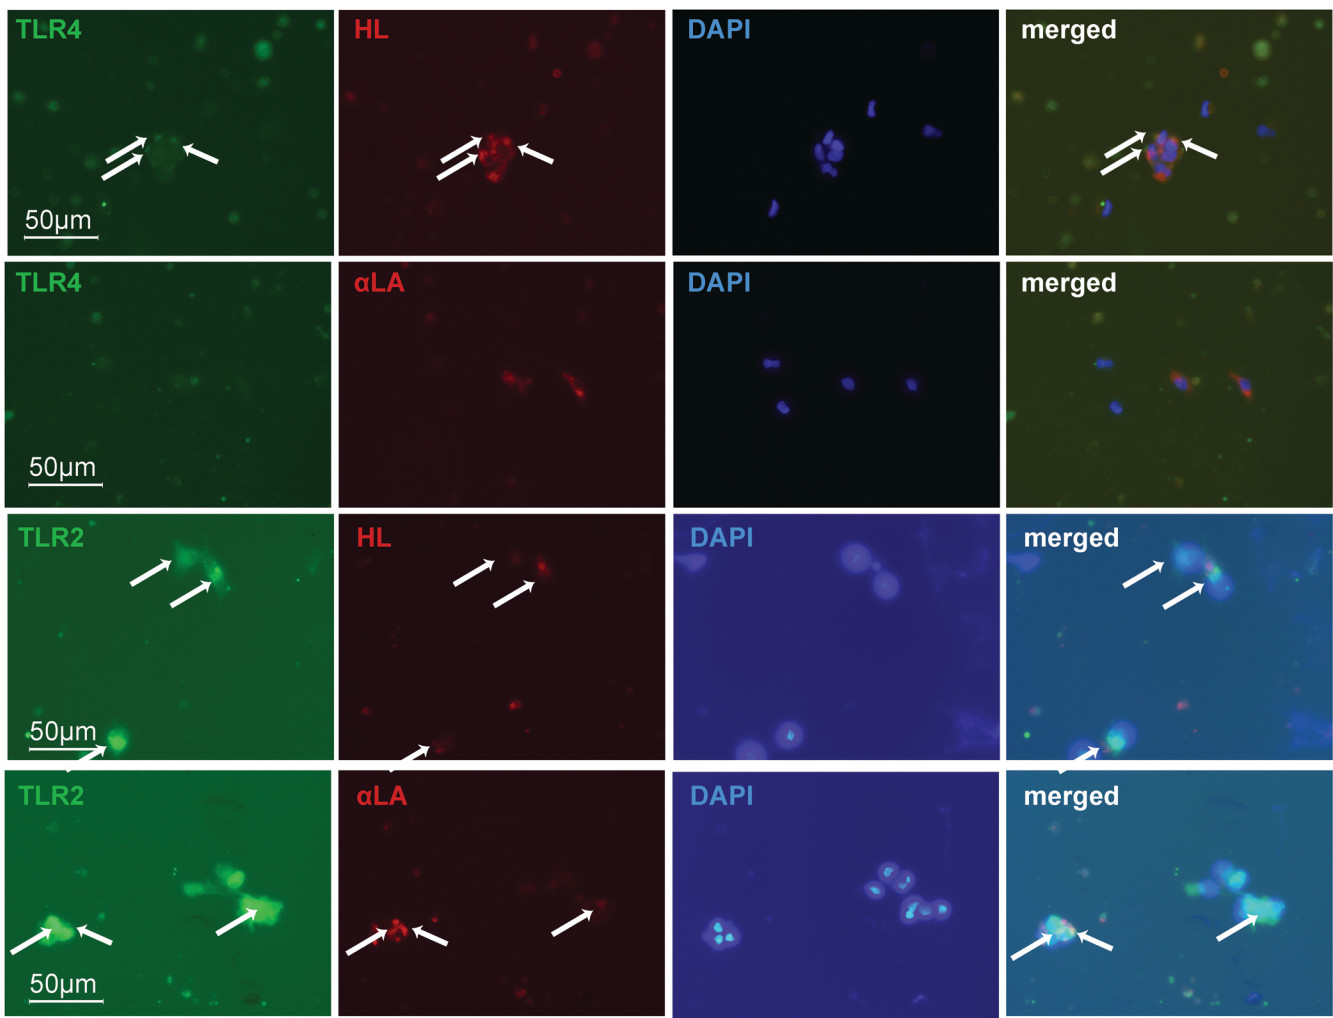

**Supplemental Figure 8.** Primary human Mo-DC (A) and Mo-M (B) were treated with Alexa-Fluor-568 labelled HAMLET (HL-568) or  $\alpha$ LA ( $\alpha$ LA-568) for 2-h and then co-stained with TLR4 or TLR2. White arrows indicate sites of potential co-localization. Vectashield DAPI was used as nuclear stain for all experiments. Images are representative of N=3 individual experiments.



A

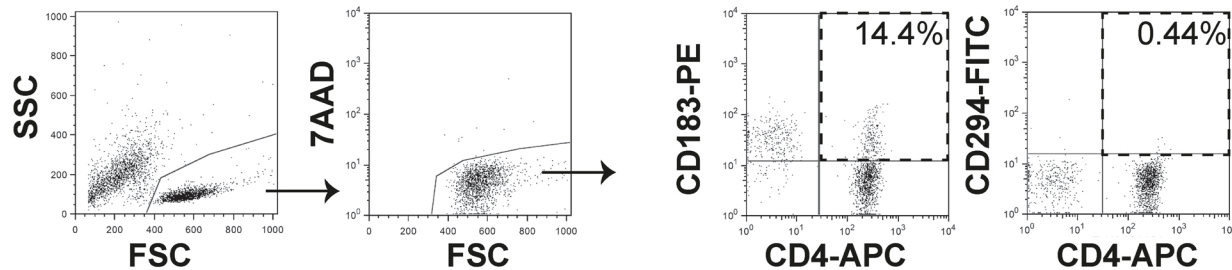

B

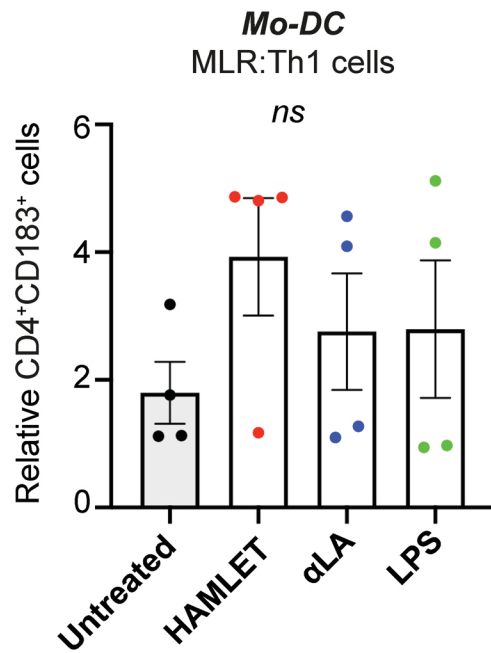

C

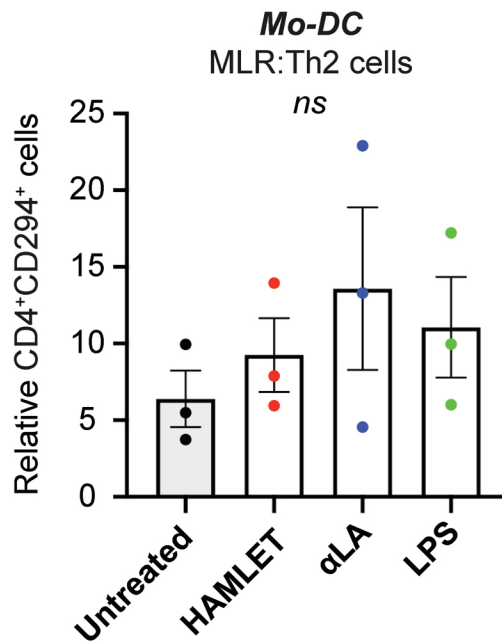

**Supplemental Figure 9.** (A-C) Primary human Mo-DCs were stimulated or not with 0.1 mg/ml HAMLET, 0.1 mg/ml native  $\alpha$ LA or 100 ng/ml LPS for 1-h and grown over night in fresh differentiation medium. The cells were re-seeded with allogeneic T-lymphocytes and co-cultured for 5 days in a mixed lymphocyte reaction (MLR) and cells were analyzed by flow cytometry. (A) Representative dot plots and gating strategies for CD4<sup>+</sup>CD183<sup>+</sup> Th1 cells and CD4<sup>+</sup>CD294<sup>+</sup> Th2 cells (dashed boxes). (B-C) Relative percentage of Th1 cells (B) and Th2 cells (C) to unstimulated T-cell control. Individual data points with mean and SEM are shown. N=3-4. Statistics by paired t-test. ns = not significant.

**RAW264.7**

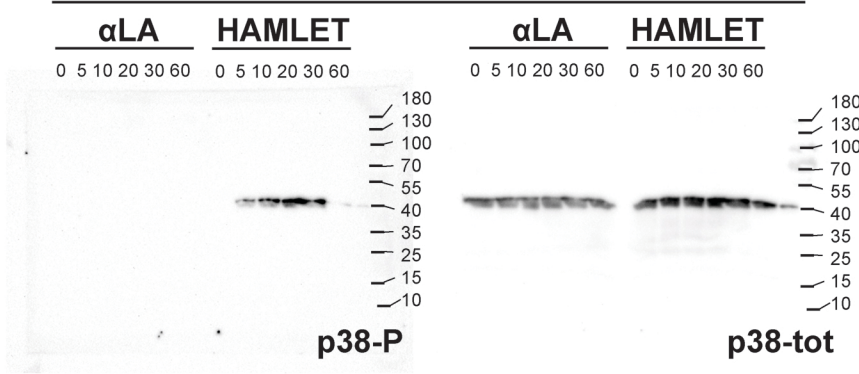

**Mo-DC**

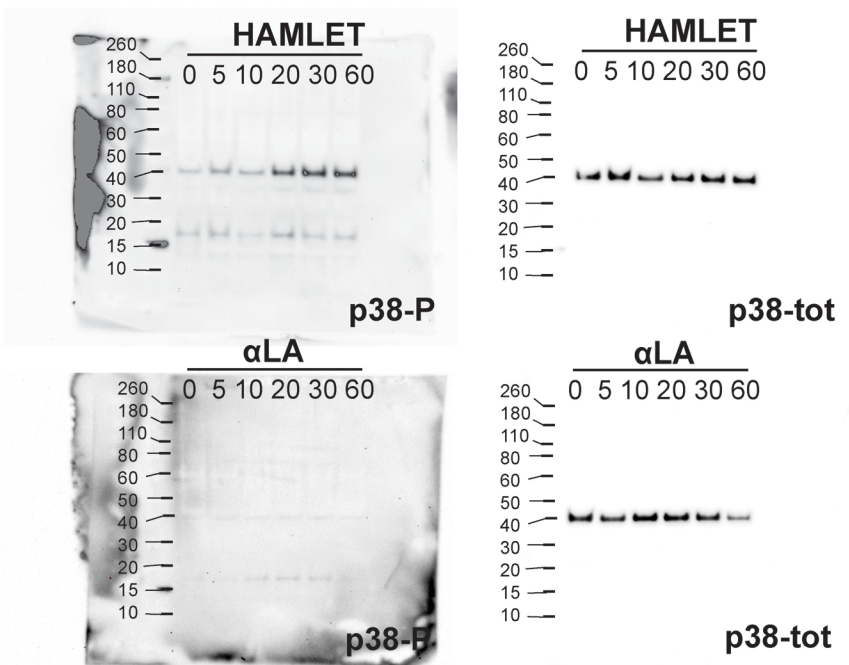

**Mo-M**

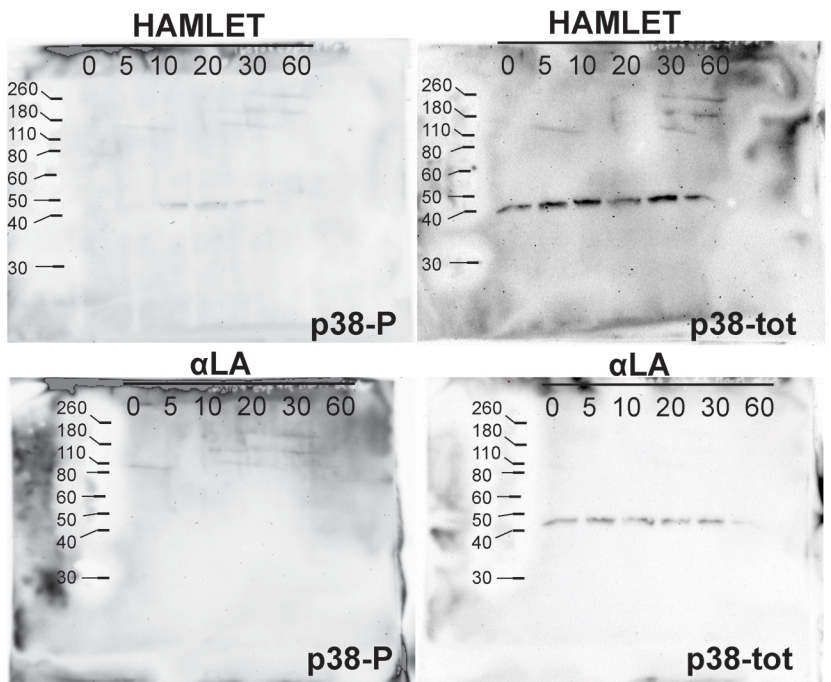

**Supplemental Figure 10.** Raw data of Western blots from Figure 4 F-H.
